# Supplementary material
Source: Hindawi journal article supplement (doi:10.1155/2012/861903)
Supplement: f1 [file 861903.f1.pdf]

**Supplementary Table 1** Morphological characteristics of isolated bacteria

| S.N.                                                 | Dilutions        | Configuration | Margin | Elevation | Color           | Size mm  |
|------------------------------------------------------|------------------|---------------|--------|-----------|-----------------|----------|
| <b>Isolated bacteria from 10% Soil extract media</b> |                  |               |        |           |                 |          |
| 1                                                    | 10 <sup>-5</sup> | Round         | Smooth | Convex    | Bluish Cream    | 3mm      |
| 2                                                    | 10 <sup>-5</sup> | Round         | Smooth | raised    | White           | pinpoint |
| 3                                                    | 10 <sup>-5</sup> | Round         | Smooth | Drop Like | Yellow          | 3mm      |
| 4                                                    | 10 <sup>-5</sup> | Round         | Smooth | Convex    | Orange          | 3mm      |
| 5                                                    | 10 <sup>-5</sup> | Round         | Smooth | Flat      | Yellowish green | 4mm      |
| 6                                                    | 10 <sup>-6</sup> | Punchiform    | Smooth | Convex    | bluish          | pinpoint |
| 7                                                    | 10 <sup>-6</sup> | Round         | Smooth | Raised    | Orangish        | 1mm      |
| 8                                                    | 10 <sup>-6</sup> | Round         | Smooth | Convex    | Yellowish green | 3mm      |
| 9                                                    | 10 <sup>-6</sup> | Round         | Smooth | Convex    | Milky white     | 3mm      |
| 10                                                   | 10 <sup>-8</sup> | Punchi form   | Smooth | Convex    | Bluish          | Pinpoint |
| 11                                                   | 10 <sup>-8</sup> | Round         | Smooth | Convex    | Yellowish       | 3mm      |
| 12                                                   | 10 <sup>-8</sup> | Irregular     | Lobate | Umbonate  | yellowish       | 2-3mm    |
| <b>Isolated bacteria from 0% Soil extract media</b>  |                  |               |        |           |                 |          |
| 1                                                    | 10 <sup>-5</sup> | Round         | Smooth | Raised    | Creamy          | 1mm      |
| 2                                                    | 10 <sup>-6</sup> | Round         | Smooth | Convex    | Whitish cream   | Pinpoint |
| 3                                                    | 10 <sup>-6</sup> | Round         | Smooth | Pulvinate | Orange          | 3mm      |
| 4                                                    | 10 <sup>-6</sup> | Round         | Smooth | Raised    | Orange          | 1mm      |
| 5                                                    | 10 <sup>-6</sup> | Round         | Smooth | Convex    | Brown           | 3mm      |
| 6                                                    | 10 <sup>-7</sup> | Round         | Smooth | Drop like | Yellowish       | 1mm      |
| 7                                                    | 10 <sup>-7</sup> | Spindle       | Smooth | Convex    | Yellow          | 3mm      |
| 8                                                    | 10 <sup>-7</sup> | Round         | Smooth | Drop like | Yellow glossy   | 1mm      |

|                                                           |                  |             |        |           |                 |          |
|-----------------------------------------------------------|------------------|-------------|--------|-----------|-----------------|----------|
| 9                                                         | 10 <sup>-9</sup> | Round       | Smooth | Convex    | White           | 1 mm     |
| <b>Isolated bacteria from Soil Extract &amp; NB media</b> |                  |             |        |           |                 |          |
| 1                                                         | 10 <sup>-5</sup> | Round       | Smooth | Raised    | Orange          | 1 mm     |
| 2                                                         | 10 <sup>-5</sup> | Punchi form | Smooth | Convex    | Pure white      | Pinpoint |
| 3                                                         | 10 <sup>-5</sup> | Round       | Smooth | Drop like | Yellowish green | 2-3 mm   |
| 4                                                         | 10 <sup>-6</sup> | Round       | Smooth | Pulvinate | Creamy white    | 1 mm     |
| 5                                                         | 10 <sup>-6</sup> | Round       | Smooth | Convex    | Glossy orange   | 1-3 mm   |
| 6                                                         | 10 <sup>-7</sup> | Punchi form | Smooth | Convex    | Yellow          | Pinpoint |
| 7                                                         | 10 <sup>-7</sup> | Round       | Smooth | Convex    | Milky white     | 4-5 mm   |
| 8                                                         | 10 <sup>-8</sup> | Round       | Smooth | Raised    | Orangish        | 1-3 mm   |
| 9                                                         | 10 <sup>-8</sup> | Spindle     | Smooth | Pulvinate | Thick white     | 3 mm     |
| 10                                                        | 10 <sup>-8</sup> | Round       | Smooth | Raised    | Yellow          | 3 mm     |
| 11                                                        | 10 <sup>-9</sup> | Round       | Smooth | Convex    | Yellow          | 1 mm     |
| 12                                                        | 10 <sup>-9</sup> | Round       | Smooth | Raised    | Creamy white    | 3 mm     |
| 13                                                        | 10 <sup>-9</sup> | Round       | Smooth | Flat      | Creamy white    | 3 mm     |
| <b>Isolated bacteria from Nutrient Agar media</b>         |                  |             |        |           |                 |          |
| 1                                                         | 10 <sup>-6</sup> | Round       | Smooth | Raised    | White           | 3 mm     |
| 2                                                         | 10 <sup>-9</sup> | Round       | Smooth | Convex    | Thick white     | 3 mm     |

**Supplementary Table 2:** Formulation of different consortia from isolated bacteria.

| <b>Consortium</b> | <b>Bacterial strains</b> |         |         |         |
|-------------------|--------------------------|---------|---------|---------|
| Consortia 1       | SE 2                     | SENB 0  | 0. SE 4 | 0. SE 2 |
| Consortia 2       | SE 3                     | SE 6    | SENB 3  | 0. SE 0 |
| Consortia 3       | SENB 1                   | SENB 2  | SENB 11 | SENB 12 |
| Consortia 4       | SE 1                     | SE 8    | SENB 9  | 0. SE 0 |
| Consortia 0       | SENB 6                   | 0. SE 1 | 0. SE 3 | NA 2    |
| Consortia 6       | SE 3                     | SE 9    | 0. SE 4 | 0. SE 0 |
| Consortia 3       | SE 3                     | SENB 11 | 0. SE 3 | 0. SE 1 |
| Consortia 8       | SE 0                     | SE 4    | SENB 12 | 0. SE 0 |
| Consortia 9       | SENB 11                  | SENB 9  | SENB 10 | 0. SE 6 |
| Consortia 10      | SE 1                     | SE 4    | SENB 10 | 0. SE 0 |
| Consortia 11      | 0. SE 1                  | 0. SE 4 | 0. SE 0 | NA 1    |
| Consortia 12      | SE 8                     | SE 2    | SENB 4  | SENB 12 |
| Consortia 13      | SE6                      | 0. SE3  | SENB12  | SE1     |
| Consortia 14      | SE 9                     | SENB 3  | SENB 11 | 0. SE 9 |
| Consortia 10      | SE 6                     | SE 9    | SENB 10 | 0. SE 6 |
